# Supplementary material for: In vivo drug release behavior and osseointegration of a doxorubicin-loaded tissue-engineered scaffold
Source: Royal Society of Chemistry journal article supplement (doi:10.1039/c6ra05351c), 2016-01-01
Supplement: c6ra05351c1.pdf [file c6ra05351c1.pdf]

## Supporting information

### *In Vivo* Drug Release Behavior and Osseointegration of Doxorubicin-loaded Tissue-engineered Scaffold

Ming Sun\*, Muwan Chen\*, Miao Wang, Jakob Hansen, Anette Baatrup, Frederik Dagnaes-Hansen, Jan Hendrik Duedal Rölfing, Jonas Jensen, Helle Lysdahl, Haisheng Li, Dang Quang Svend Le, Mogens Johannsen, Jørgen Kjems, and Cody E. Bünger

A

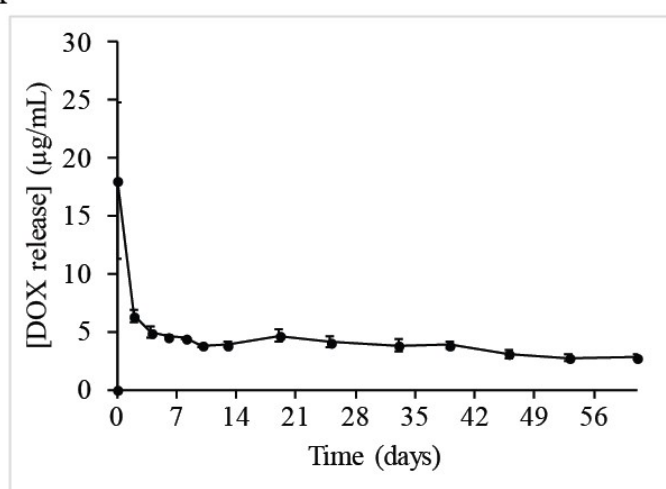

B

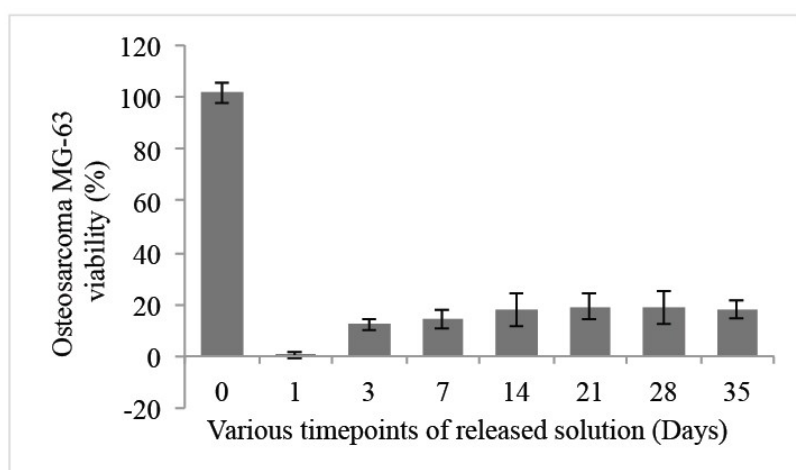

**Figure S1.** Release profile and cytotoxicity of DOX from DESCLAYMR scaffold *in vitro*. (A) DOX release concentration from DESCLAYMR scaffolds ( $\phi = 8$  mm,  $h = 10$  mm) loaded with DOX (400  $\mu$ L/scaffold) at 37°C in PBS (pH 7.4) for 7 weeks. Data are presented as mean  $\pm$  standard deviation.  $n = 4$ . (B) Viability of the human osteosarcoma cells MG-63 cultured in DOX release solution from serial timepoints by XTT assay. The DOX release solution from day 35 could inhibit 82% of the osteosarcoma cells.
